# Supplementary material
Source: PubMed Central journal article supplement (PMC5740683)
Supplement: pnas.201716483SI.pdf [file pnas.201716483SI.pdf]

# Supporting Information

Kastenhuber et al. 10.1073/pnas.1716483114

## SI Materials and Methods

One sgRNA was cloned into the px330 vector, which was a gift from Feng Zhang (Addgene; plasmid 42230), and a second U6-sgRNA cassette was inserted into the XbaI site with XbaI-NheI overhangs.

As indicated, for other experiments (Fig. S1), the lenti-CRISPR vector was a gift from David Sabatini (Addgene; plasmid 70662). The pT3 transposon and SBBase vectors were a kind gift of Xin Chen, University of California, San Francisco, CA.

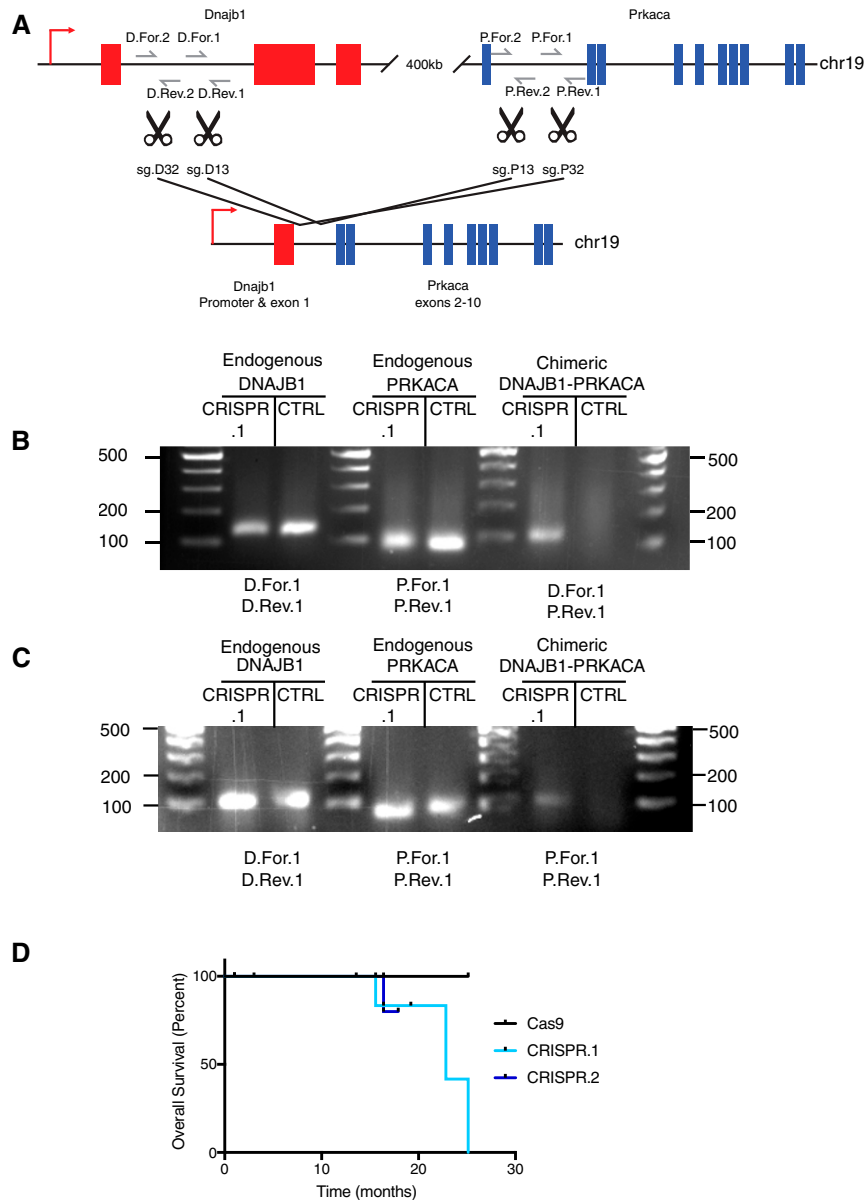

**Fig. S1.** Validation of CRISPR-mediated deletion. (A) Schematic of sgRNAs and primers. (B) Detection of genomic deletion in NIH 3T3 cells infected with a tandem guide lentiCRISPR construct. (C) Detection of deletion in genomic DNA extracts from whole livers 4 d following hydrodynamic tail-vein injection of the same construct. (D) Overall survival of mice following hydrodynamic tail-vein injection of the lentiCRISPR plasmid DNA.

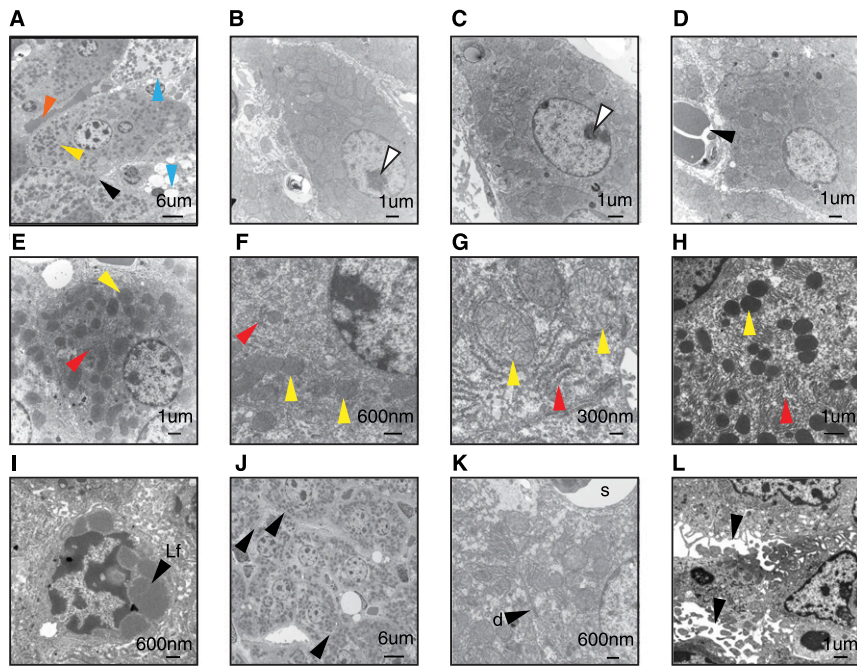

**Fig. S2.** Additional ultrastructural analysis of murine FL-HCC. (A) Higher magnification of Fig. 3A. FL-HCC tumor cells are enlarged with abnormally abundant mitochondria (yellow arrowhead). Necrotic cells (blue), nonfenestrated vessels (orange), and indistinct cell-cell junctions (black). (B and C) Tumor nuclei are large and round-to-indentured with prominent nucleoli (white). (D) Tumor-associated vasculature (black). (E-H) Abundant mitochondria (yellow) surrounded by rough endoplasmic reticulum (red) with scant smooth endoplasmic reticulum. (I) Lipofuscin (Lf). (J) Simple, indistinct cell-cell junctions (black). (K) Rare desmosome (d) with nearby sinusoid (s). (L) Bile canniculi are sometimes widened (black).

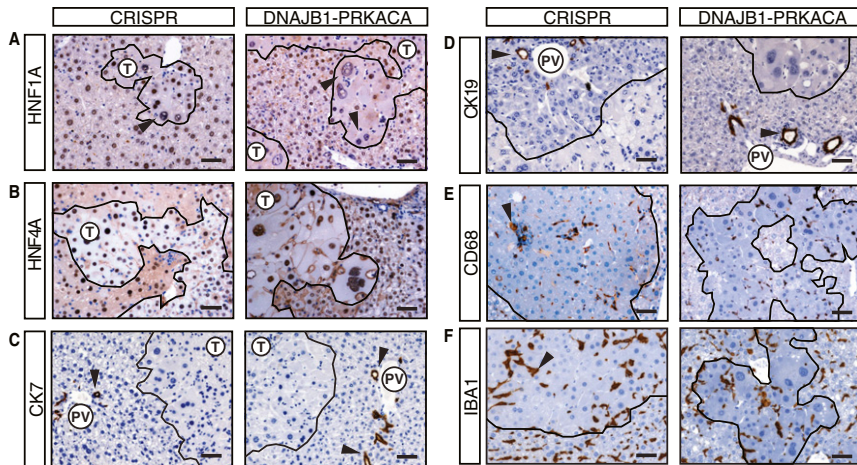

**Fig. S3.** Additional molecular characterization of murine FL-HCC. Indicated genotypes stained for hepatocyte markers (A) HNF1A and (B) HNF4A (arrowheads indicate tumor cells with reduced staining), cholangiocyte markers (C) CK7 and (D) CK19 (arrowheads indicate bile ducts; PV, portal vein), (E) CD68 (arrowheads indicate CD68+ infiltrating macrophages), and (F) IBA1 confirming E (arrowheads indicate IBA1+ infiltrating macrophages). (Scale bars, 50 µm.)

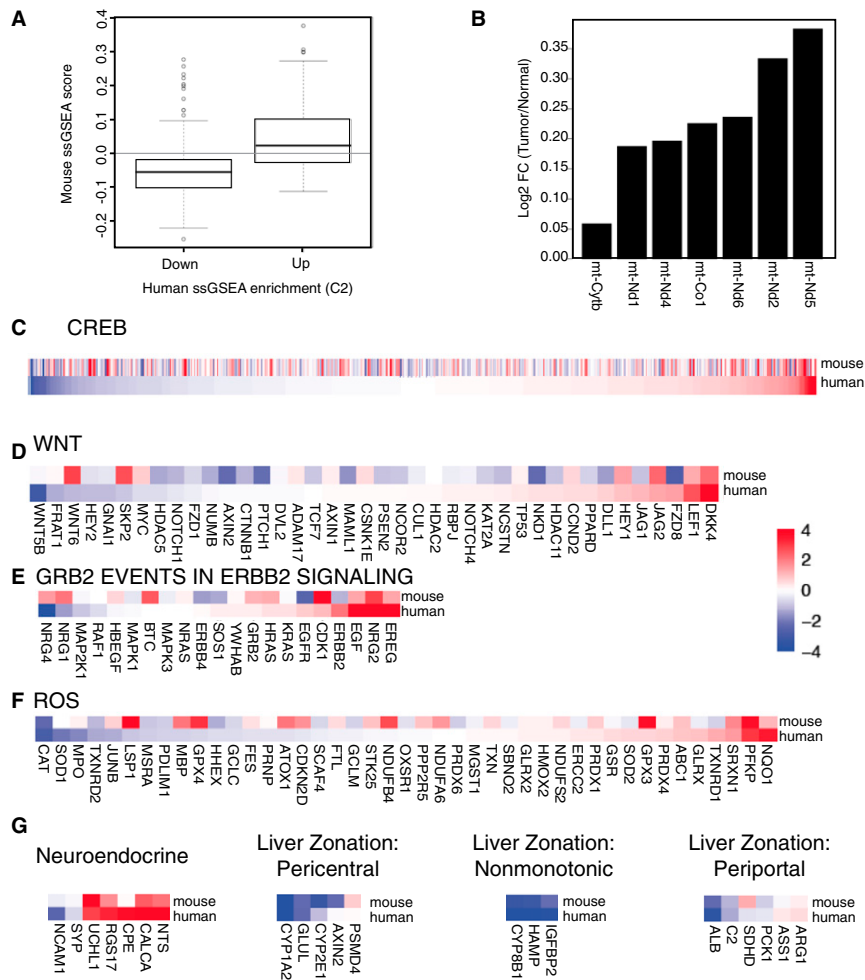

**Fig. S4.** Gene expression of FL-HCC-associated gene sets of interest. (A) ssGSEA enrichment scores from mouse tumor differential expression for gene sets significantly enriched in either up-regulated or down-regulated human gene expression data (30) ( $P = 4.22 \times 10^{-17}$ ). (B) Gene expression for genes encoded by mitochondrial DNA. (C–F) Gene expression of corresponding mouse and human (30) genes in the specified gene sets: (C) CREB targets; (D) Wnt signaling pathway; (E) GRB2 events in ERBB2 signaling; and (F) genes up-regulated by ROS. (G) Lineage-specific genes including neuroendocrine markers (30) and liver zone-specific genes (34).



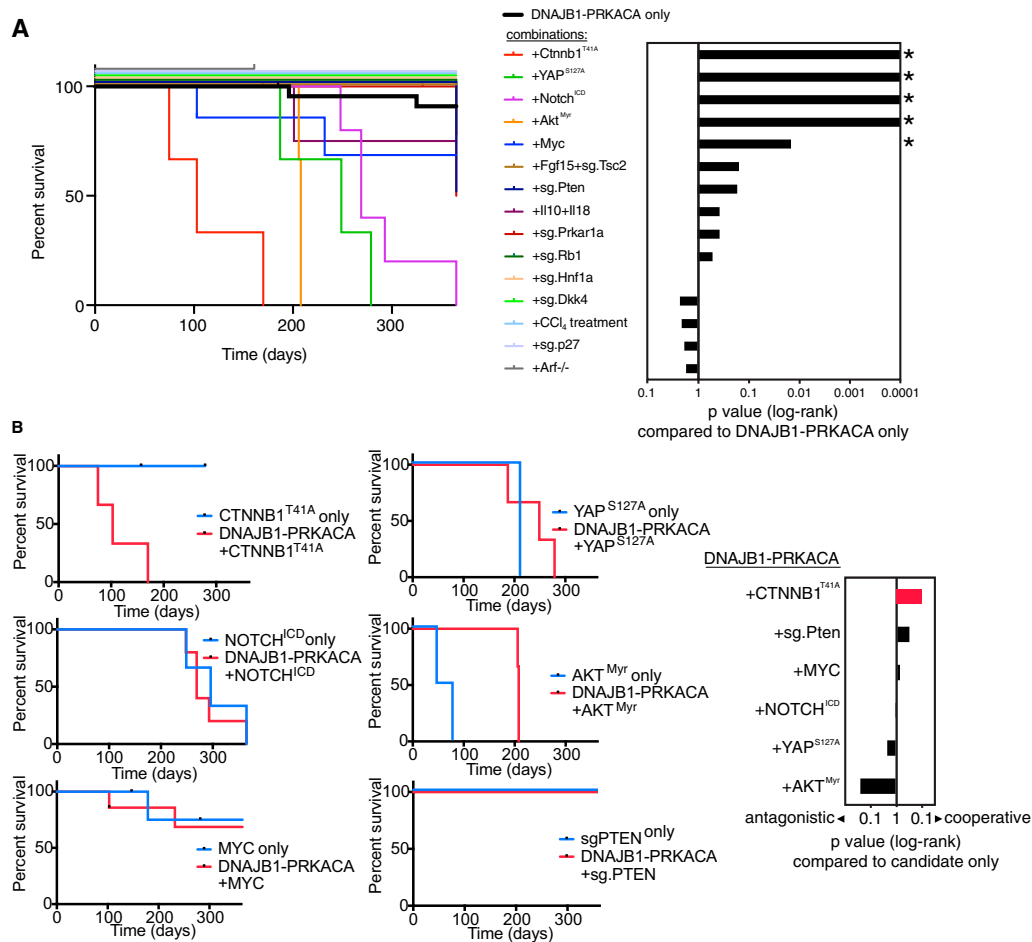

**Fig. S6.** Screen for cooperating mutations. (A) Survival data of cohorts injected with DNAJB1-PRKACA fusion cDNA alone or in combination with the indicated genotypes. \*Log-rank  $P < 0.01$ . (B) Survival data of cohorts injected with candidate genes from A alone or in combination with the fusion. CTNNB1<sup>T41A</sup> cooperates with DNAJB1-PRKACA, resulting in higher lethality than either gene alone.

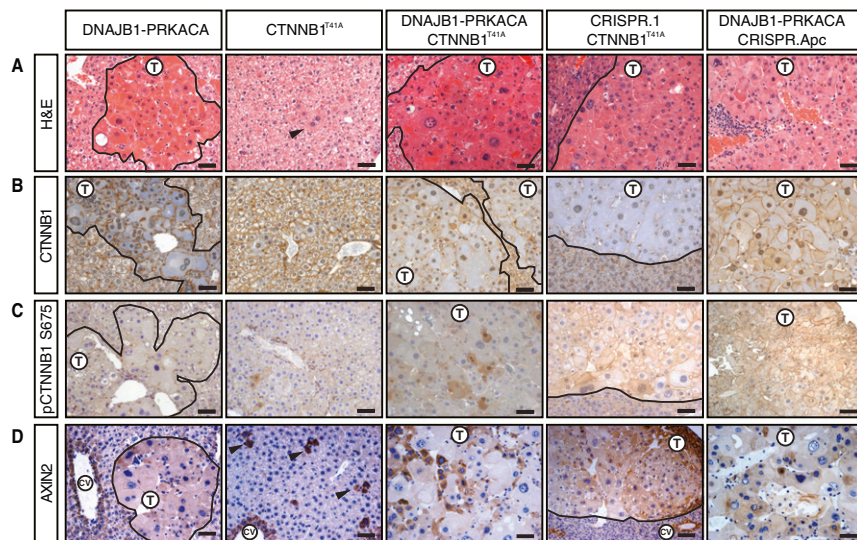

**Fig. S7.** Wnt pathway in murine FL-HCC. Livers injected with DNAJB1-PRKACA, CTNNB1<sup>T41A</sup>, DNAJB1-PRKACA + CTNNB1<sup>T41A</sup>, CRISPR.1 + CTNNB1<sup>T41A</sup>, or DNAJB1-PRKACA + CRISPR.Apc. (A) H&E or immunohistochemistry with antibodies against (B) CTNNB1, (C) p-CTNNB1 S675 (PKA target site), and (D) AXIN2 (Wnt target gene). CV, central vein (AXIN2 internal positive control). Arrowheads, atypical hepatocytes; T, tumor. (Scale bars, 50  $\mu$ m.)
